# Supplementary material for: A highly sensitive and selective fluorescent chemosensor for Pb2+ ions in an aqueous solution
Source: Royal Society of Chemistry journal article supplement (doi:10.1039/c2dt32531d), 2012-11-15
Supplement: c2dt32531d.pdf [file c2dt32531d.pdf]

## Supporting Information

### A Highly Sensitive and Selective Fluorescent Chemosensor for Pb<sup>2+</sup> Ion in Aqueous Solution

Jing Liu,<sup>a</sup> Kai Wu,<sup>a</sup> Sha Li,<sup>a</sup> Tao Song,<sup>a</sup> Yifeng Han\*<sup>a</sup> and Xin Li\*<sup>b</sup>

<sup>a</sup>*The Key Laboratory of Advanced Textile Materials and Manufacturing Technology, Department of Chemistry, Zhejiang Sci-Tech University, Hangzhou, 310018, China.*

<sup>b</sup>*ZJU-ENS Joint Laboratory of Medicinal Chemistry, College of Pharmaceutical Sciences, Zhejiang University, Hangzhou, 310058, China.*

*hanyf@zstu.edu.cn and lixin81@zju.edu.cn*

## Contents

|                                                                                     |     |
|-------------------------------------------------------------------------------------|-----|
| Photophysical properties of the sensors·····                                        | S2  |
| Emission spectra, competition experiment, and Job's plot of sensor <b>LS2</b> ····· | S3  |
| Determination of the association constant·····                                      | S4  |
| The characterization data of all compounds·····                                     | S5  |
| References·····                                                                     | S12 |

**Photophysical properties of the sensors**

**Table S1.** Photophysical properties of the sensors.

| entry      | $\lambda_{ab}$ (nm) | $\lambda_{em}$ (nm) | $\Phi_0^a$ | $\Phi_1^a$         | $\epsilon / M^{-1} cm^{-1}$ |
|------------|---------------------|---------------------|------------|--------------------|-----------------------------|
| <b>LS3</b> | 497                 | 508                 | 0.005      | 0.005              | 28150                       |
| <b>LS2</b> | 497                 | 508                 | 0.006      | 0.014 <sup>b</sup> | 34820                       |
| <b>LS1</b> | 497                 | 510                 | 0.006      | 0.112 <sup>c</sup> | 40380                       |

(a) The quantum yield of the sensor ( $\Phi_0$ ) and the sensor-Pb<sup>2+</sup> ( $\Phi_1$ ) were determined according to the literature.<sup>2</sup> (b)  $\Phi_1$  was determined in the present of 100 equiv of Pb<sup>2+</sup> ions. (c)  $\Phi_1$  was determined in the present of 2 equiv of Pb<sup>2+</sup> ions.

$$\Phi_S = \frac{\Phi_B I_S A_B \lambda_{exB} \eta_S}{I_B A_S \lambda_{exS} \eta_B}$$

Where  $\Phi$  is quantum yield; I is integrated area under the corrected emission spectra; A is absorbance at the excitation wavelength;  $\lambda_{ex}$  is the excitation wavelength;  $\eta$  is the refractive index of the solution; the S and B refer to the sample and the standard, respectively. We chose fluorescein in 0.1 M NaOH as standard, which has the quantum yield of 0.95.<sup>1</sup>

### Emission spectra, competition experiment, and Job's plot of sensor LS2

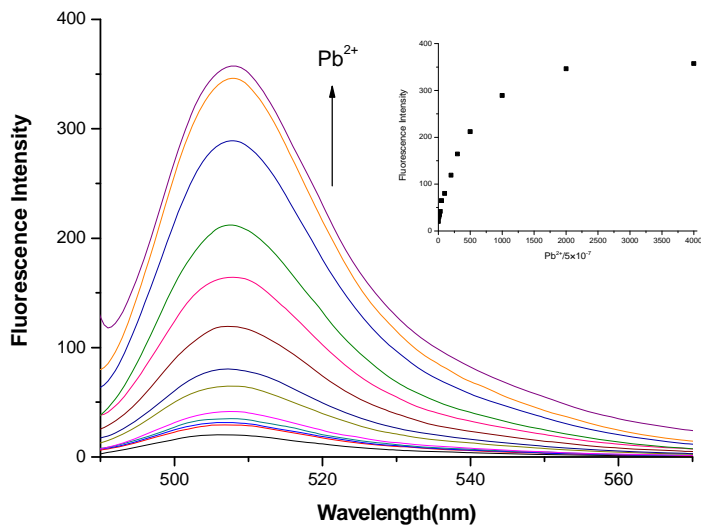

**Figure S1.** Emission spectra ( $\lambda_{\text{ex}} = 470 \text{ nm}$ ) of **LS2** (0.5  $\mu\text{M}$ ) in phosphate (0.1 M) solution (pH = 7.2) in the presence of different concentrations of  $\text{Pb}^{2+}$  ions. The up-arrow indicates the increase of  $[\text{Pb}^{2+}]$  from 0 to 3 mM. Inset: Binding isotherm between **LS2** and  $\text{Pb}^{2+}$  with emission intensity at 510 nm.

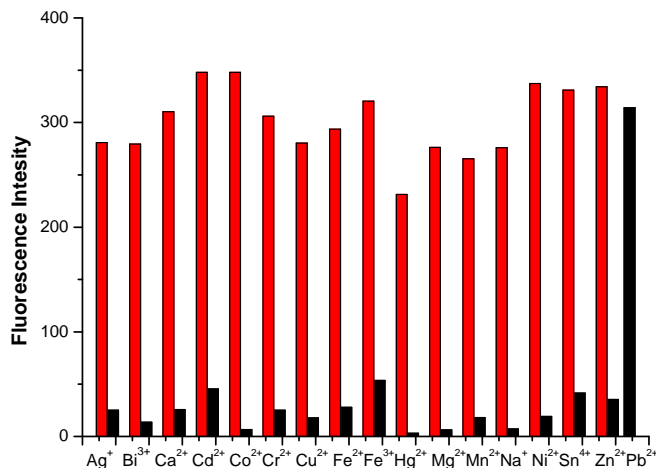

**Figure S2.** Fluorescence responses of **LS2** to various metal ions (0.1 M PBS, pH 7.2). Black bars represent the addition of 5.0 equiv of the appropriate metal ion to a 5  $\mu\text{M}$  solution of **LS2**. Red bars represent the addition of 5.0 equiv of  $\text{Pb}^{2+}$  to the solutions containing **LS2** and the appropriated metals.

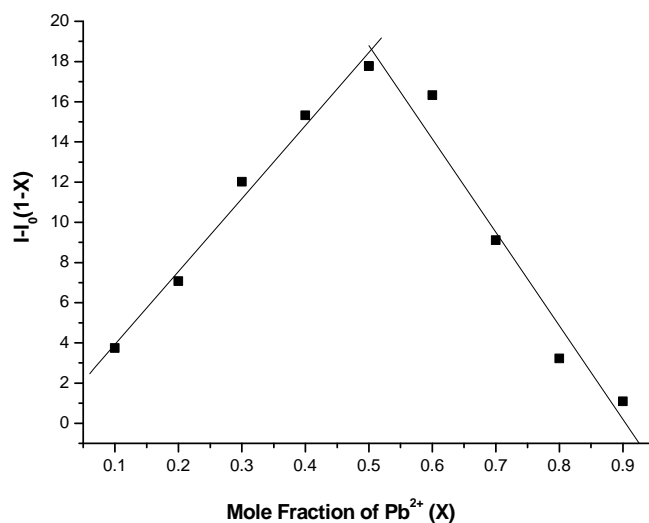

**Figure S3.** Job's plot of sensor **LS2** in 0.1 M phosphate buffered water solution (pH = 7.2). The total concentration of the sensor and Pb<sup>2+</sup> is 5.0 μM.

### Determination of the association constant

The association constant  $K_S$  were determined by a nonlinear least-squares analysis of  $I$  versus  $c_M$  using the following equation:<sup>2</sup>

$$I = \frac{I_0 + c_M \Phi K_{11} [M] + I_{\text{lim}} K_S [M]^2}{1 + K_{11} [M] + K_S [M]^2}$$

Where  $K_S = K_{11} K_{21}$

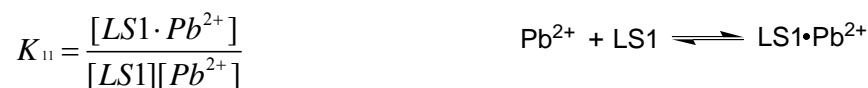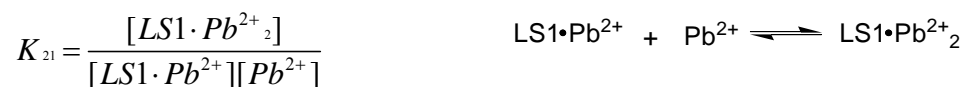

$[M] \approx c_M$  is Pb<sup>2+</sup> ion concentration,  $I_0$  or  $I$  is integrated emission in the absence or presence of Pb<sup>2+</sup> ions,  $\Phi$  is approximately substituted by 0.014, the quantum yield of the 1:1 **LS2**-Pb<sup>2+</sup> complex, since the quantum yield of the 1:1 **LS1**-Pb<sup>2+</sup> complex could not be precisely determined.

The characterization data of all compounds

<sup>1</sup>H NMR of compound 3

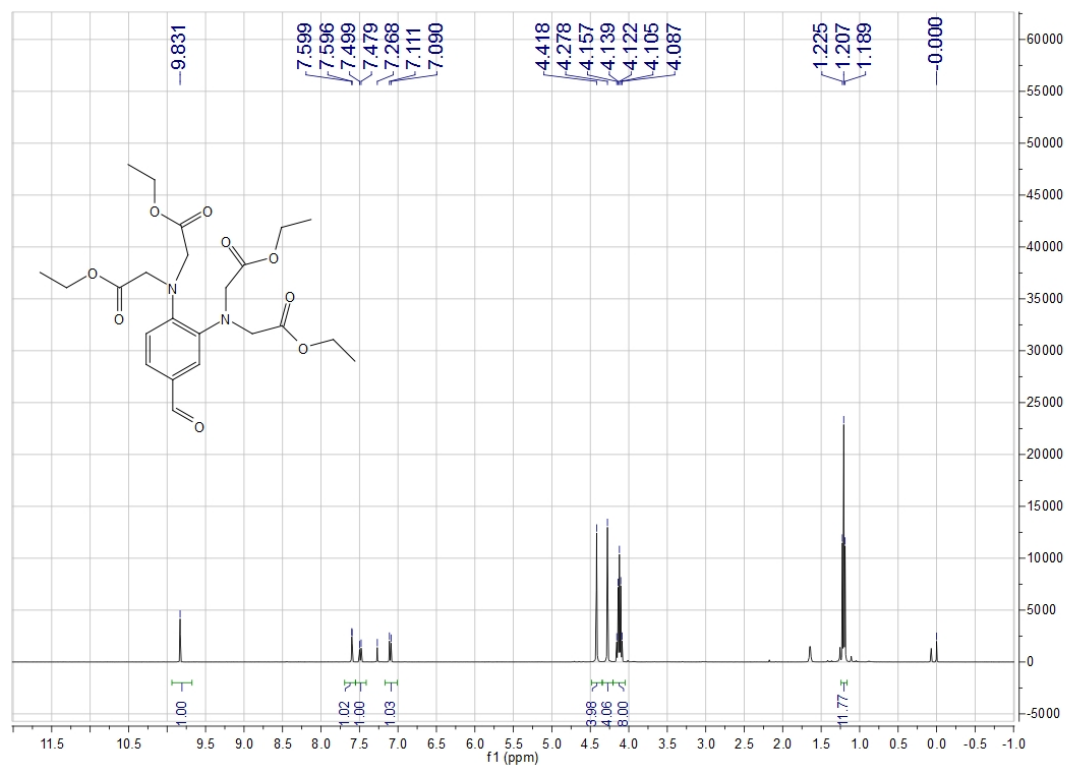

<sup>1</sup>H NMR of compound 4

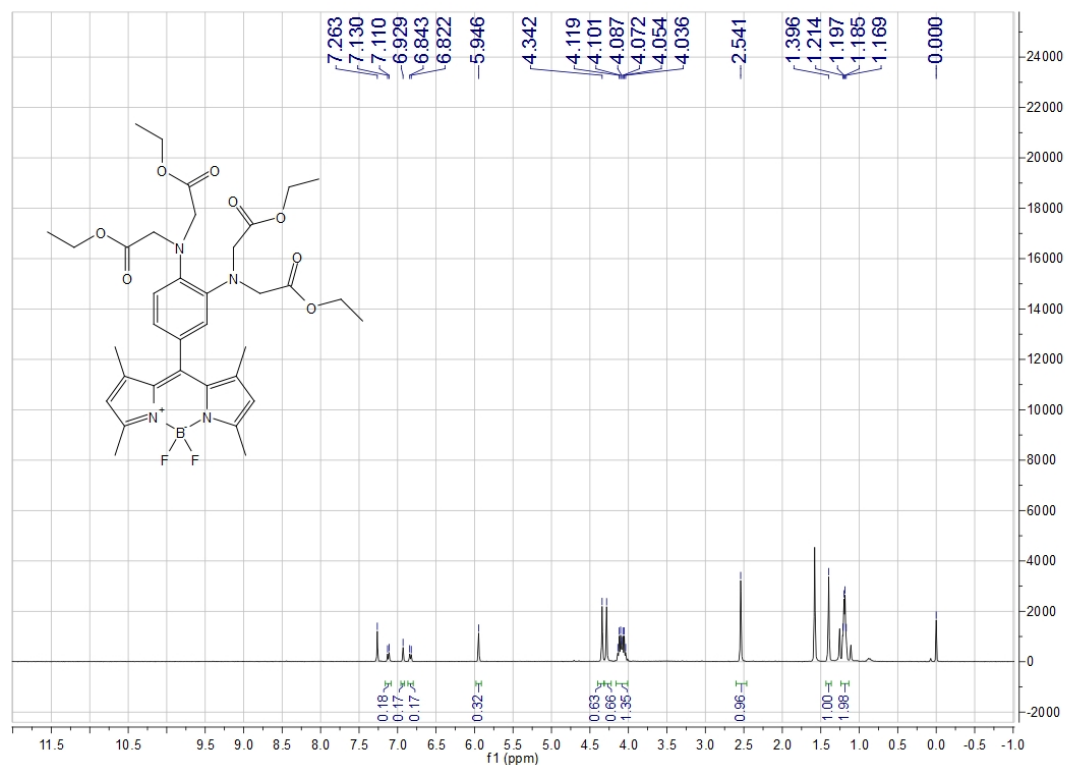

$^1\text{H}$  NMR of compound **5** (LS1)

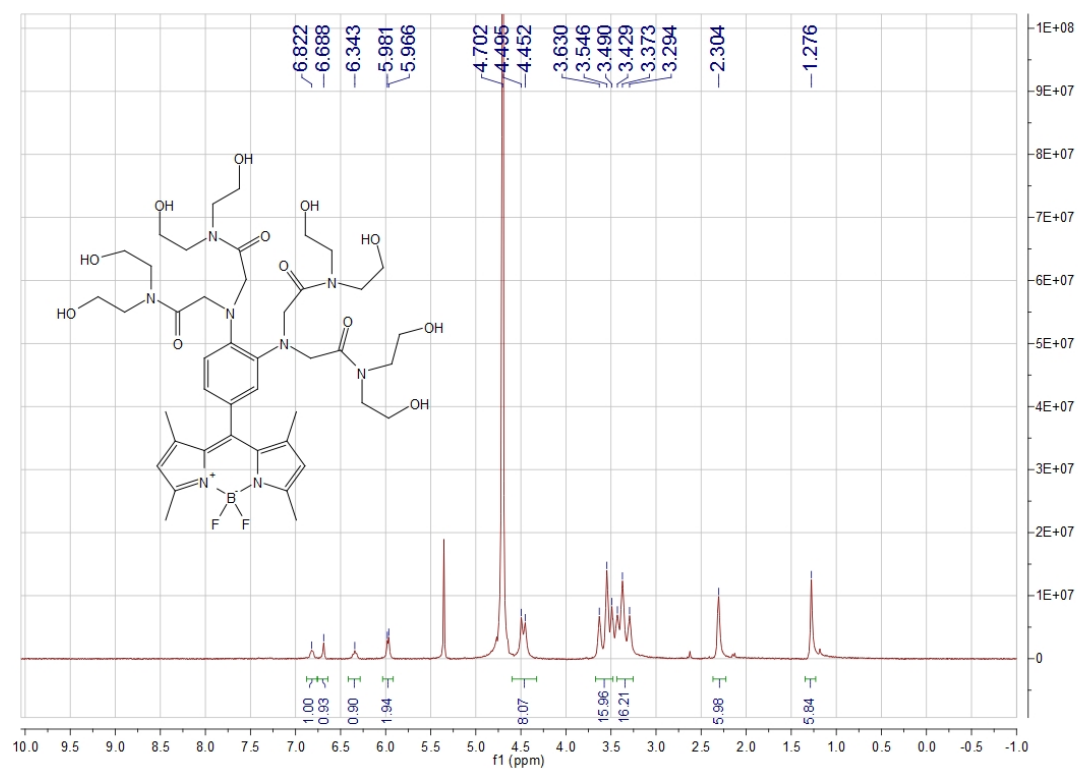

$^{13}\text{C}$  NMR of compound **5** (LS1)

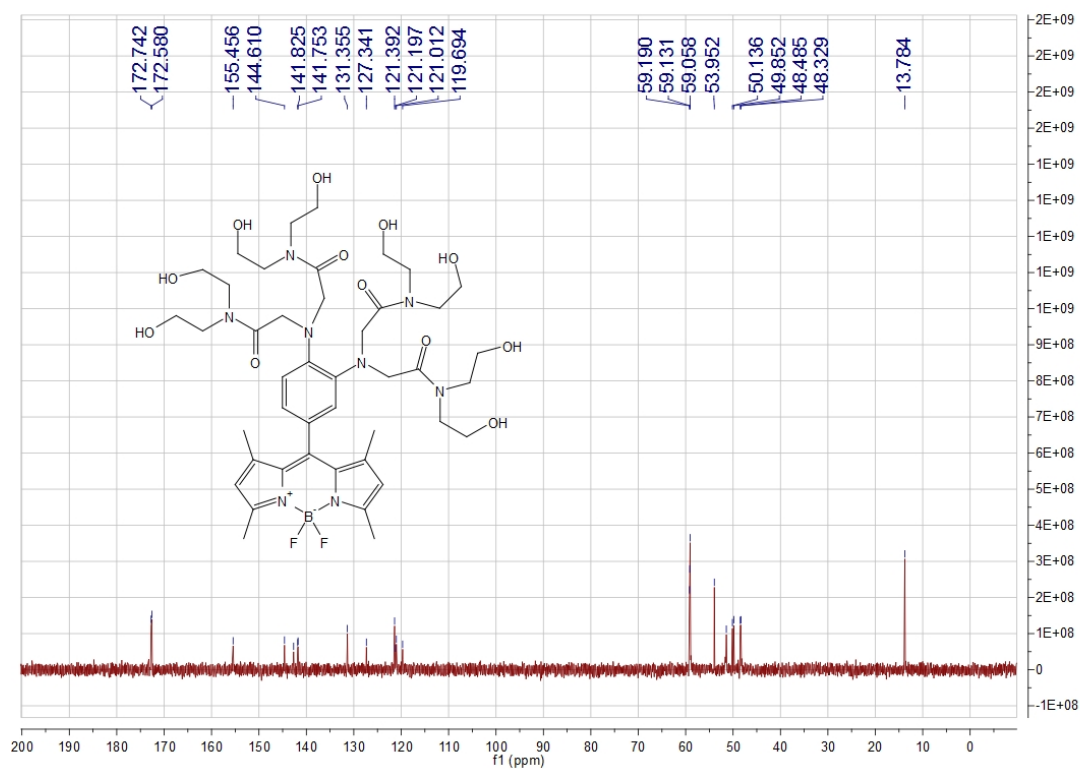

# HRMS of compound **5** (LS1)

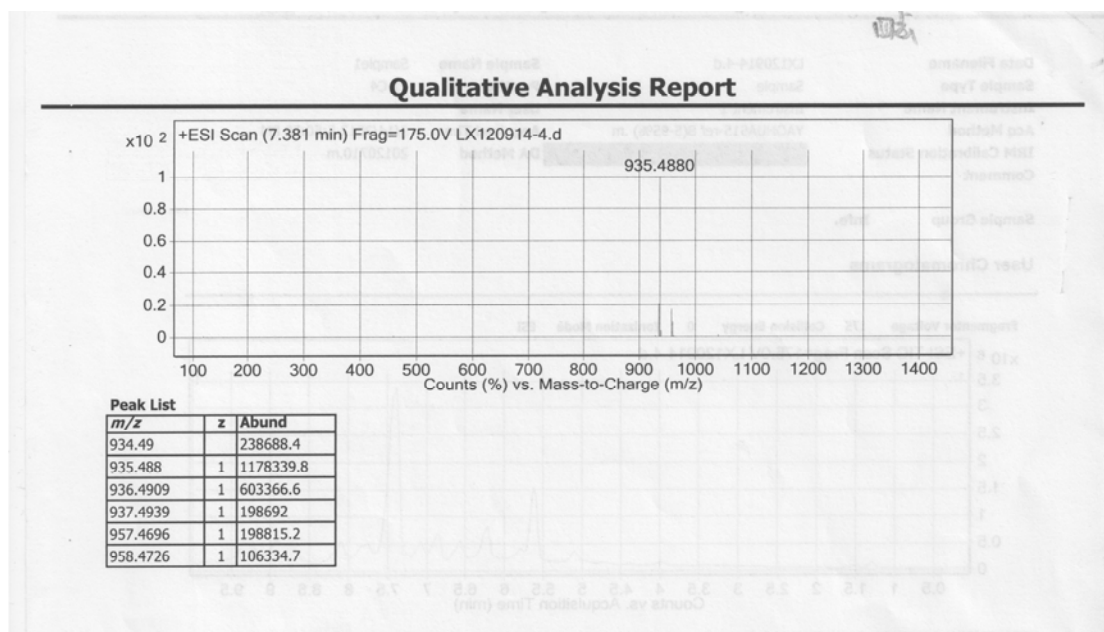

# $^1\text{H}$ NMR of compound **6**

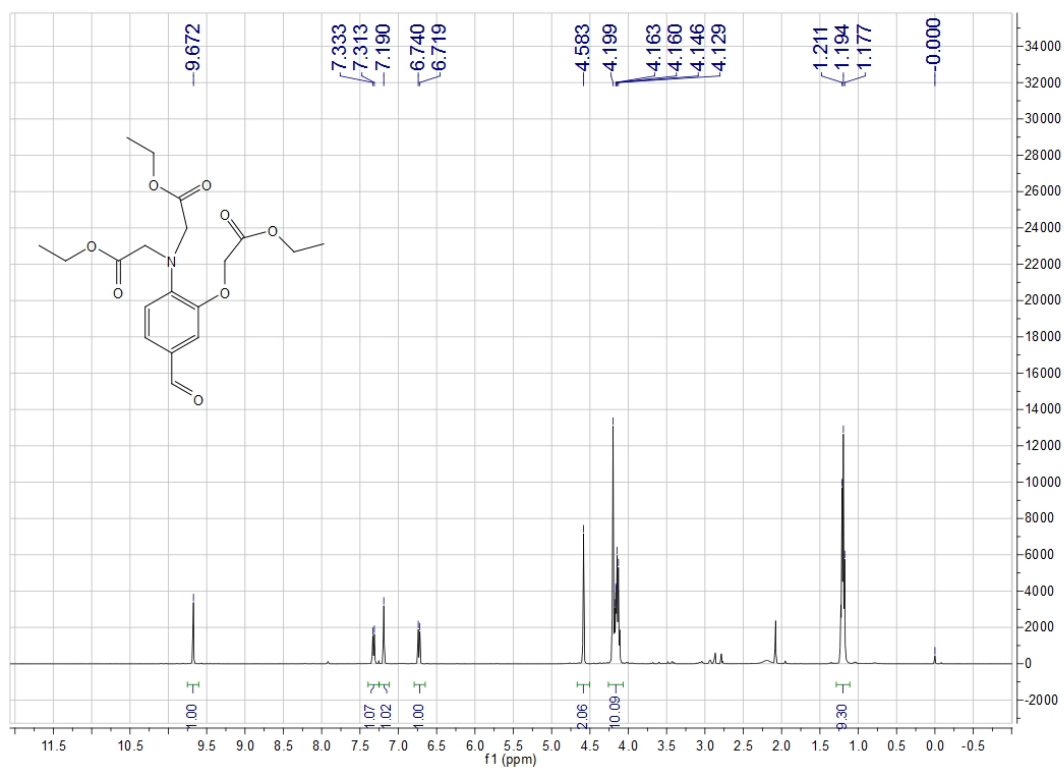

<sup>1</sup>H NMR of compound **7**

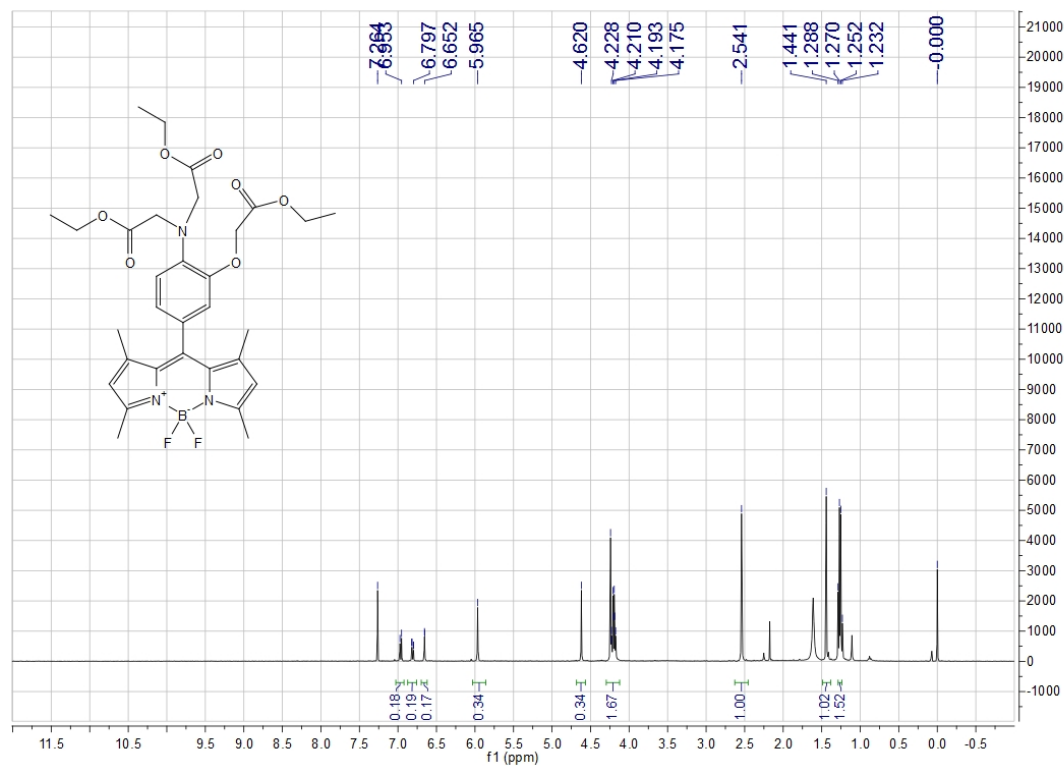

<sup>1</sup>H NMR of compound **8 (LS2)**

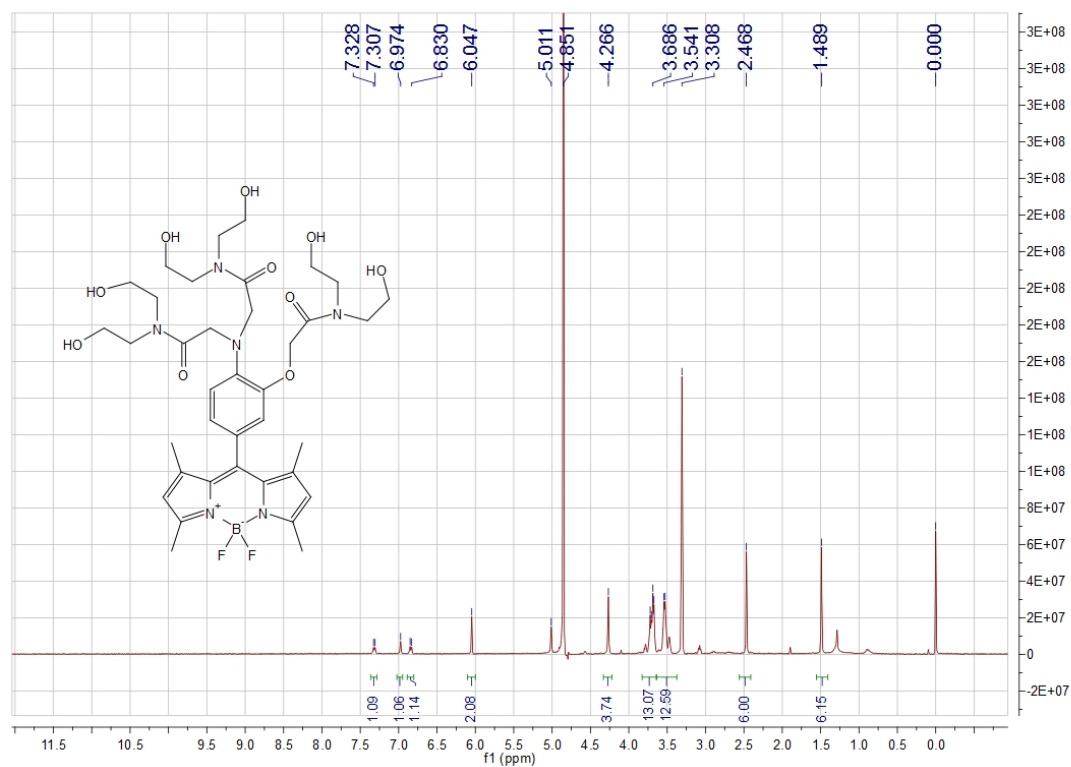



<sup>13</sup>C NMR of compound **8** (LS2)

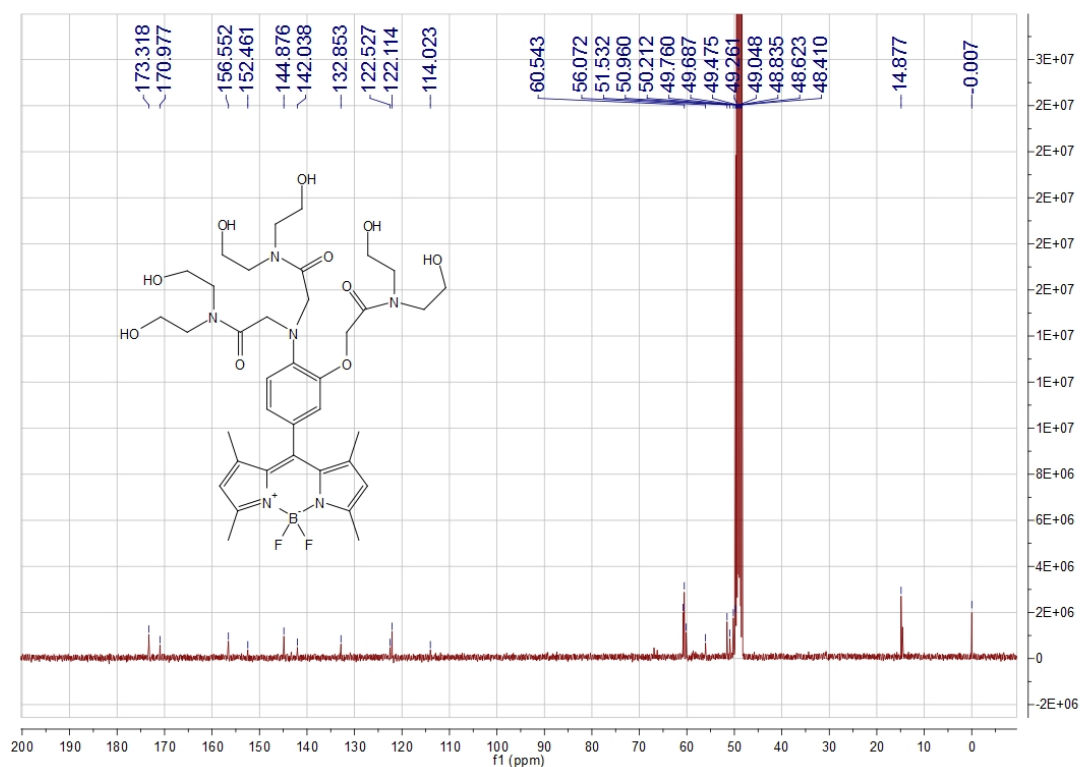

HRMS of compound **8** (LS2)

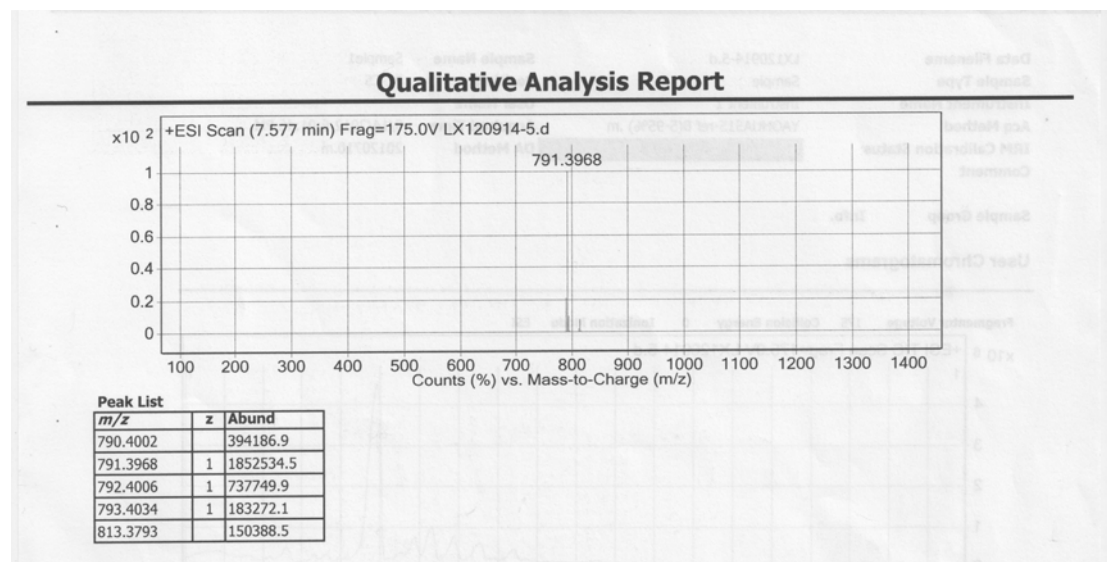

<sup>1</sup>H NMR of compound **9**

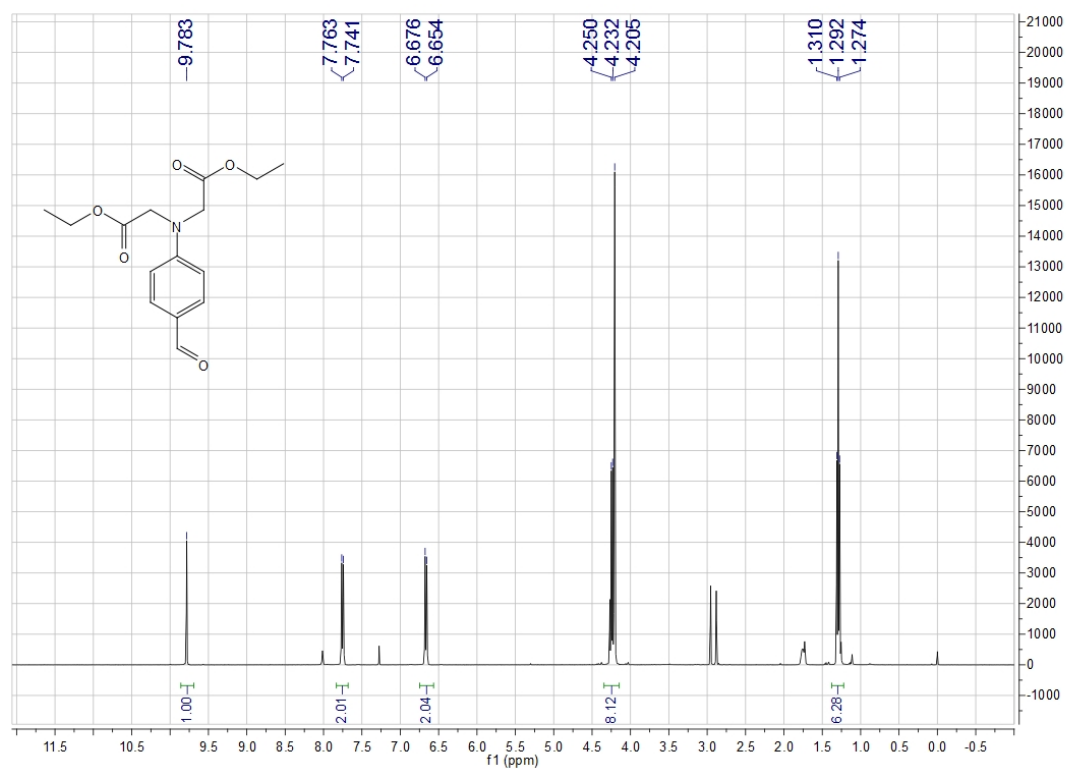

<sup>1</sup>H NMR of compound **10**

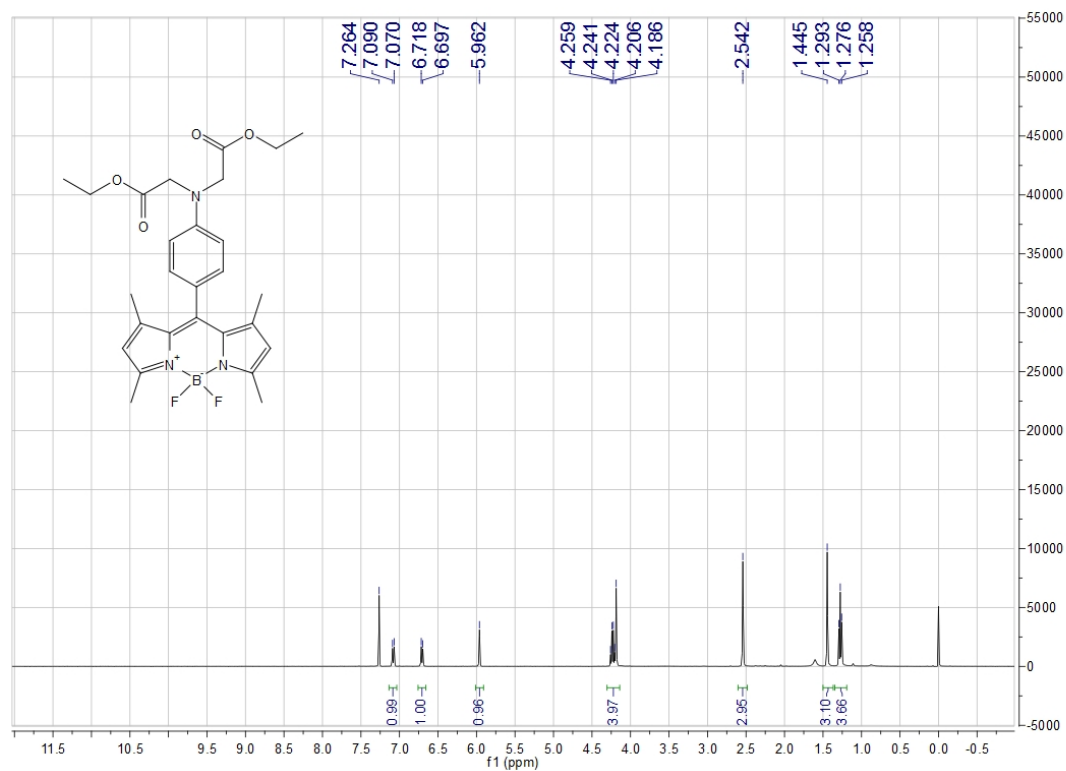

<sup>1</sup>H NMR of compound **11** (LS3)

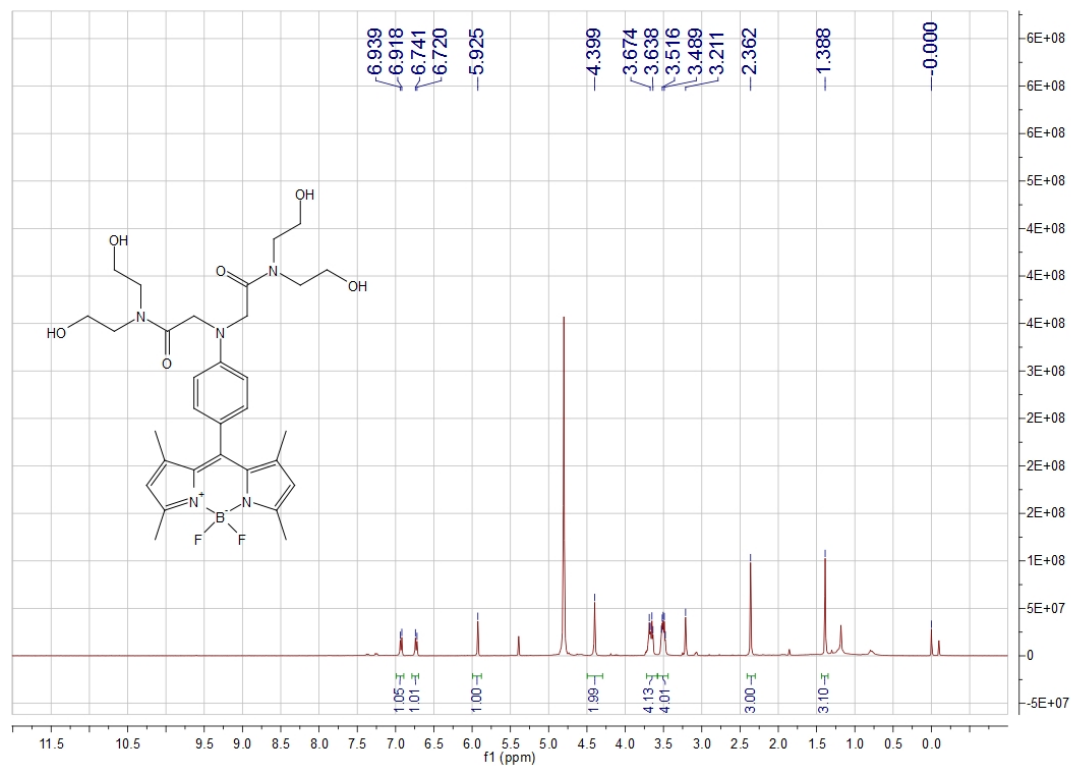

HRMS of compound **11** (LS3)

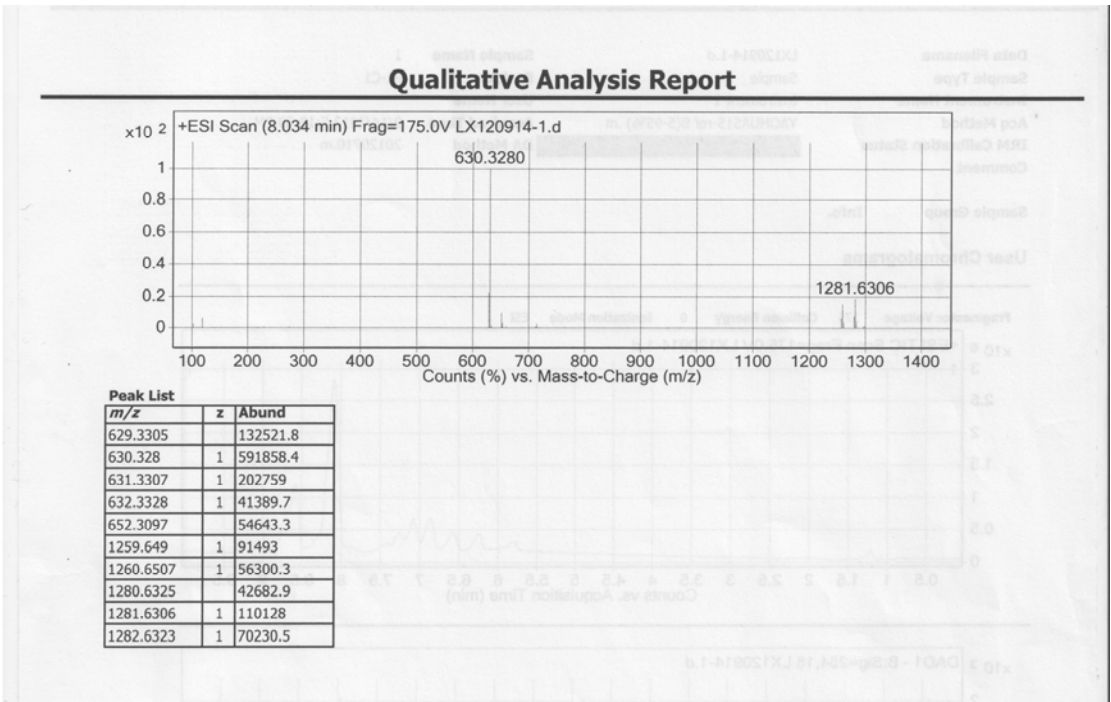

## References

- (1) Velapoldi, R. A.; Tønnesen, H.; *H. J. Fluoresc.* **2004**, *14*, 465-472.
- (2) Valeur, B. *Molecular Fluorescence: Principles and Applications*; Wiley-VCH, Weinheim, Germany, 2002.
